# Supplementary material
Source: PubMed Central journal article supplement (PMC2763183)
Supplement: NIHMS150488-supplement-Supplemental_data.pdf [file NIHMS150488-supplement-Supplemental_data.pdf]

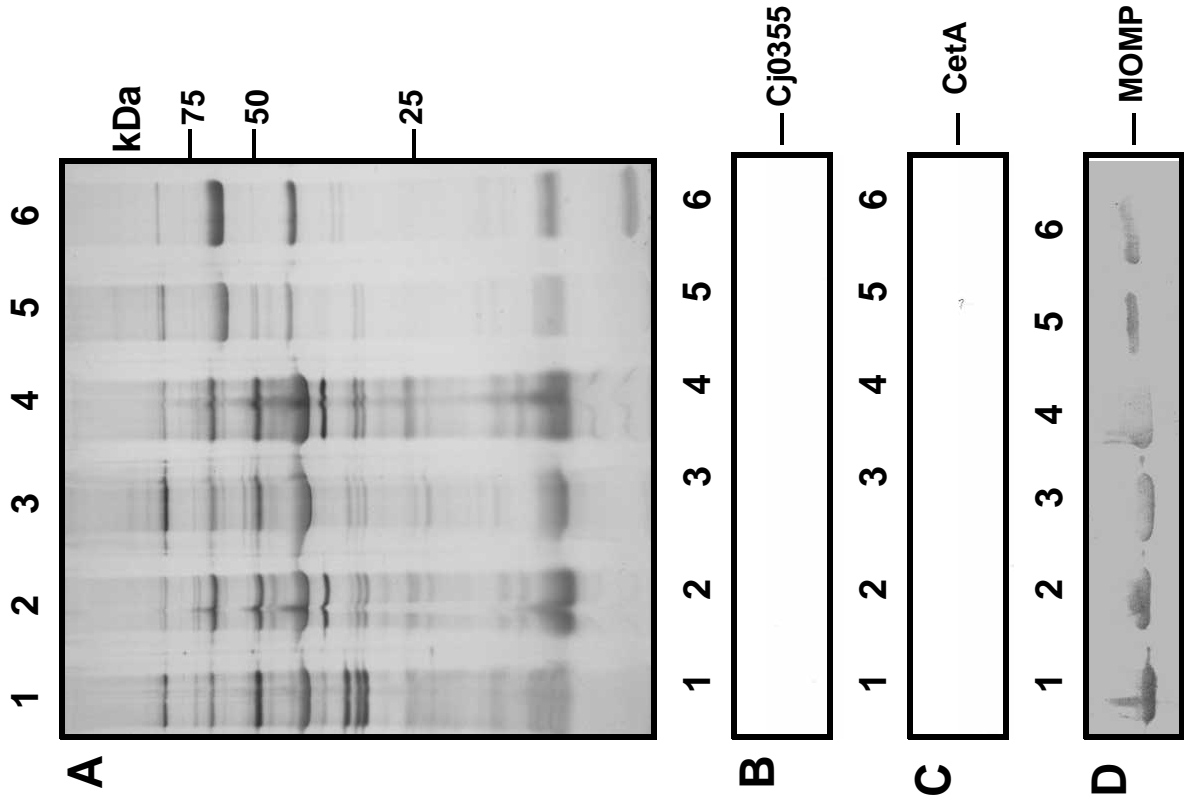

Figure S1

FIGURE S1: Analysis of sarkosyl outer membranes from additional *C. jejuni* and *C. coli* strains. (A) Silver stained 12% SDS-PAGE gel of the five *C. jejuni* strains and *C. coli*. Lane 1, 81116; lane 2, INP44; lane 3, HB95-29; lane 4, INP59; lane 5, NCTC11168 and lane 6, *C. coli*, strain D3088. 5  $\mu$ g of each sample was loaded per lane. Molecular masses are indicated at side of panel (in kDa). (B) Immunoblot using the cytoplasmic marker anti-Cj0355 (1:1000) (C) Immunoblot using the inner membrane marker anti-CetA (1:1000). (D) Immunoblot using the outer membrane marker anti-MOMP (1:1000).
